# Supplementary material
Source: PubMed Central journal article supplement (PMC2799866)
Supplement: 0906869106_0906869106SI.pdf [file 0906869106_0906869106SI.pdf]

# Supporting Information

Yuan et al. 10.1073/pnas.0906869106

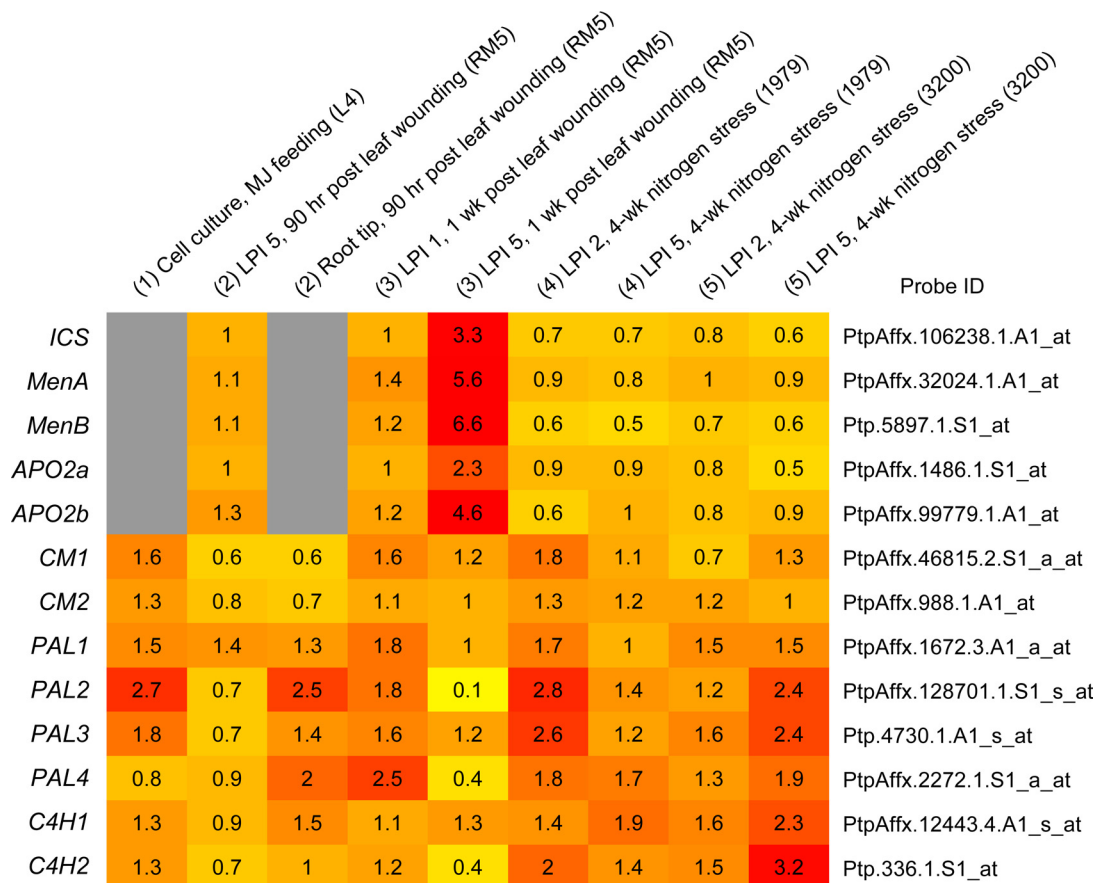

**Fig. S1.** Heat map showing that *Populus ICS* is coregulated with orthologs of *Arabidopsis* genes involved in PhQ biosynthesis and PSI function, but not with phenylpropanoid pathway genes. Gene expression ratios (treatment over the respective control) were obtained from Affymetrix GeneChip analysis, and visualized using the HeatMapperPlus Tool (<http://www.bar.utoronto.ca/ntools/cgi-bin/ntools.heatmapper.plus.cgi>). MenA, 1,4-dihydroxy-2-naphthoate phenyltransferase; MenB, 1,4-dihydroxy-2-naphthoyl CoA synthase; APO2, accumulation of photosystem one 2; CM, chorismate synthase; PAL, phenylalanine ammonia-lyase; and C4H, cinnamate 4-hydroxylase (corresponding probe ID shown on the right). Data were extracted from the following GEO series: (1) *Populus tremuloides* (clone L4) cell culture response to 25  $\mu$ M methyl jasmonate (MJ) feeding (GenBank accession no. GSE16786); (2) and (3) *Populus fremontii*  $\times$  *angustifolia* (clone RM5) leaf wounding responses: (2) leaves from leaf plastchron index (LPI) 2 and root tips were analyzed 90 h after wounding (accession no. GSE16785), whereas (3) LPI1 and LPI5 were used 1 week after wounding in a separate experiment (GenBank accession no. GSE16783); (4) and (5) *Populus fremontii*  $\times$  *angustifolia* response to nitrogen stress: LPI2 and LPI5 from clone 1979 (4) and clone 3200 (5) were analyzed 4 weeks after the start of the nitrogen stress treatment (GenBank accession nos. GSE14515 and GSE14893). Gray color indicates gene expression was below detection in both treatment and control samples.

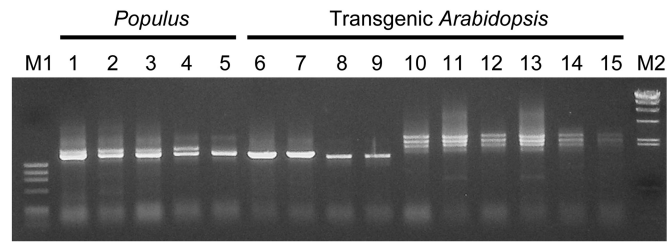

**Fig. S2.** RT-PCR amplification of *ICS* from various *Populus* genotypes (lanes 1–5) and transgenic *Arabidopsis* lines (lanes 6–15). Lanes 1–3: three different *P. fremontii* × *angustifolia* hybrid genotypes; lane 4: *P. trichocarpa*; lane 5: *P. tremuloides*; lanes 6 and 7: two independent transgenic *Arabidopsis sid2-2* lines harboring the full-length *PtiICS* cDNA; lanes 8 and 9: two independent transgenic *Arabidopsis sid2-2* lines harboring *PtiICS* cDNA without the predicted plastid-targeting presequence; lanes 10–13: independent transgenic *Arabidopsis* lines carrying the 6-kb genomic *PtiICS* gene under control of the CaMV 35S promoter in the *sid2-2* mutant (10 and 11) or Col-0 background (12 and 13); lanes 14 and 15: two independent transgenic *Arabidopsis sid2-2* lines harboring the 8-kb *PtiICS* gene in the *sid2-2* mutant background. M1 and M2: molecular markers PhiX174-HaeIII and Lambda-HindIII, respectively.

```

genomic   TCAACTCGATAAAGAAGACCAGCAAGAAAGAGCATAAAATTCCTGAAGTGTAAATTTCTAGACTCCTGAATTGGAGTCATCAGT
N1        TCAACTCGATAAAGAAGACCAGCAAGAAAGAGCATAAAATTCCTGAAGTGTAAATTTCTAGACTCCTGAATTGGAGTCATCAGT
N2        TCCACTCGATAAAGAAGACCAGCAAGAAAGAGCATAAAATTCCTGAAGTGTAAATTTCTAGACTCCTGAGTTGGAGTCATCAGT
N5        TCAACTCGATAAAGAAGACCAGCAAGAAAGAGCATAAAATTCCTGAAGTGTAAATTTCTAGACTCCTGAATTGGAGTCATCAGT
N12       TCAACTCGATAAAGAAGACCAGCAAGAAAGAGCATAAAATTCCTGAAGTGTAAATTTCTAGACTCCTGAATTGGAGTCATCAGT
         ** *****
genomic   TTGCACCCATTGGTTTTCTACGAGGCACTTGATGCAAACTAGCTGTAACTTTCACACTATTACCTGGTAGCTTTTGCC
N1        TTGCACCCATTGGTTTTCTATGAGGCACTTGATGCAAACTAGCTGTTACTTTTCACACTATTACCTGGTAGCTTTTGCC
N2        TTGCACCCATTGGTTTTCTATGAGGCACTTGATGCAAACTAGCTGTTACTTTTCACACTATTACCTGGTAGCTTTTGCC
N5        TTGCACCCATTGGTTTTTATGAGGCACTTGATGCAAACTAGCTGTTACTTTTCACACTATTACCTGGTAGCTTTTGCC
N12       TTGCACCCATTGGTTTTCTATGAGGCACTTGATGCAAACTAGCTGTTACTTTTCACACTATTACCTGGTAGCTTTTGCC
         ***** ** *****
genomic   CGATGGATCTTGGAATCAAGTAAAGCTTAGTTGGCAGGAGAAGTACCAAGAGCTTATAGCATGTTAGATAGCAGCACTT
N1        CGATGGATCTTGGAATCAAGCAAAAGCTTAGTTGGCAGGAGAAGTACCAAGAGCTTATAGCATGTTAGATAGCAGCACTT
N2        CGATGGATCTTGGAATCAAGTAAAGCTTAGTTGGCAGGAGAAGTACCAAGAGCTTATAGCATGTTAGATAGCAGCACTT
N5        CGATGGATCTTGGAATCAAGTAAAGCTTAGTTGGCAGGAGAAGTACCAAGAGCTTATAGCATGTTAGATAGCAGCACTT
N12       CGATGGATCTTGGAATCAAGTAAAGCTTAGTTGGCAGGAGAAGTACCAAGAGCTTATAGCATGTTAGATAGCAGCACTT
         ***** *****
genomic   AAATTGTATCAGTCTGATTTTTTTTCCAGATAGGGAACGTGTCGGTATTCTTTATTTTTTTATGAAAGAATATCTTTTT
N1        AAATTGTATCGGTTGATTTTTTTTCCAGATAGGGAACGGTTCGGTATTCTTTATTTTTTTATGAAAGAATATCTTTTT
N2        AAATTGTATCGTTTTGATTTTTTTTCCAGATAGGGAACGGTTCGGTATTCTTTATTTTTTTATGAAAGAATATCTTTTT
N5        AAATTGTATCGTTTTGATTTTTTTTCCAGATAGGGAACGGTTCGGTATTCTTTATTTTTTTATGAAAGAATATCTTTTT
N12       AAATTGTATCGGTTGATTTTTTTTCCAGATAGGGAACGGTTCGGTATTCTTTATTTTTTTATGAAAGATATCTTTTT
         ***** ** *****
genomic   CTTTTTACTTTAATTTTTTGACCAAGTTGGAGAAGGTGTAATATTCCTTTAGCAATTTGATAATGTTTCCCCAACATCTTT
N1        CTTTTTACTTTAATTTTTTGACCAAGTGGGAGAAGGTGTAATATTCCTTTAGCAATTTGATAATGTTTCCCCAACATCTTG
N2        CTTTTTACTTTAATTTTTTGACCAAGTGGGAGAAGGTGTAATATTCCTTTAGCAATTTGATAATGTTTCCCCAACATCTTG
N5        CTTTTTACTTTAATTTTTTGACCAAGTGGGAGAAGGTGTAATATTCCTTTAGCAATTTGATAATGTTTCCCCAACATCTTG
N12       CTTTTTACTTTAATTTTTTGACCAAGTGGGAGAAGGTGTAATATTCCTTTAGCAATTTGATAATGTTTCCCCAA-----
         **** *****
genomic   CATTACTTTTTCATGCCATGCTTACAGTTTTATGAGTGAATTTGAATTTCTGTTCTGCTGGTCTACTGGCTGAAGAGT
N1        CATTACTTTTTCATGCCATGCTTACAGTTTTATGAGTGAATTTGAATTTCTGTTTACAAAAA
N2        CATTACTTTTTCATGCCATGCTTACAGTTTTATGAGTGA-----AAAAAAAA
N5        CATTACTTTTTCATGCCATGCTTACGA-----AAAAA-----AAAAAAAA
N12       -----AAAAAAAA

```

Fig. S3. Alignment of representative *Pupulus* ICS 3' UTR sequences showing alternative polyadenylation patterns. Translational stop codon is shown in boldface. Clone N12 represents the predominant transcript type (6 of 9) among the sequenced clones.

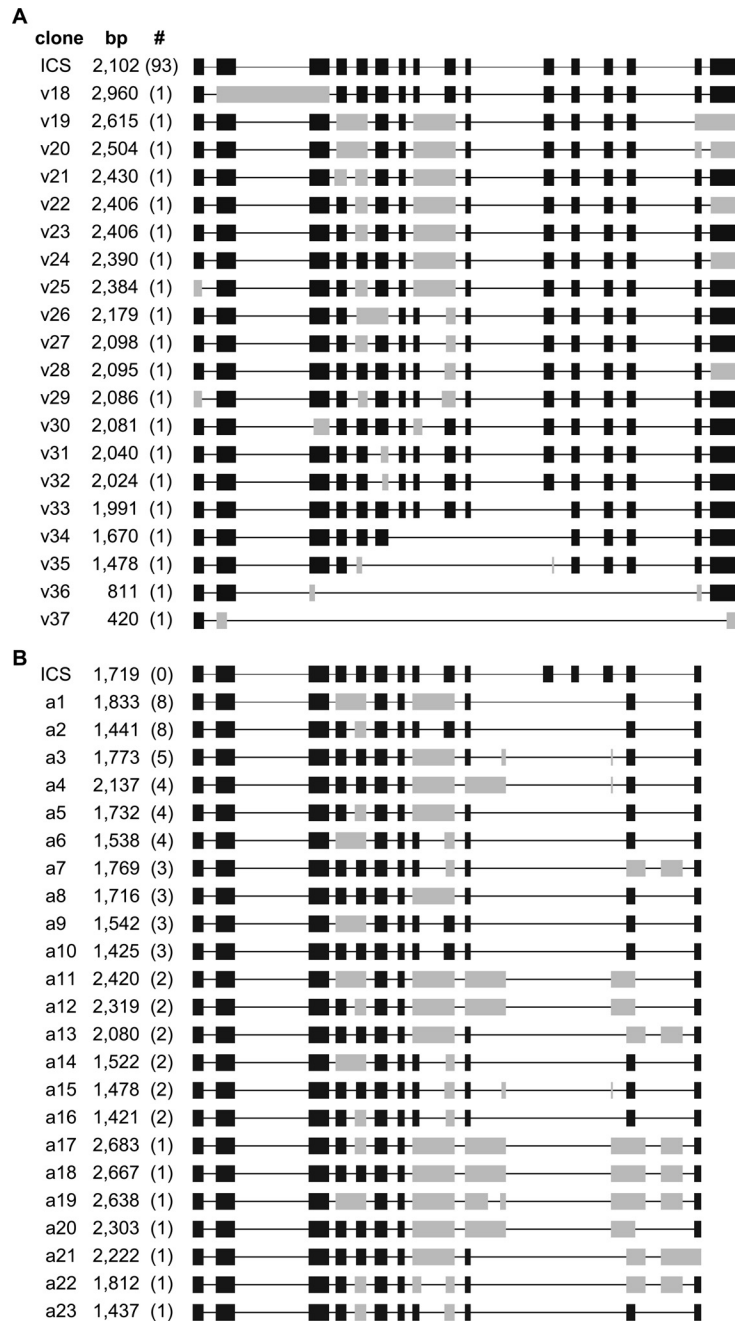

**Fig. S4.** Additional *Populus ICS* splice variants not shown in Fig. 3. (A) Splice variants from *Populus* leaf RT-PCR with a single occurrence among the 184 sequenced clones. (B) Representative splice variants recovered from transgenic *Arabidopsis* expressing the 6-kb genomic *PtilICS* under control of the 35S promoter. Clones are arranged in order of abundance (frequencies in parentheses), with the normal *ICS* transcript shown at the top. A total of 64 RT-PCR clones were sequenced. Exons affected by alternative splicing are shown in gray.

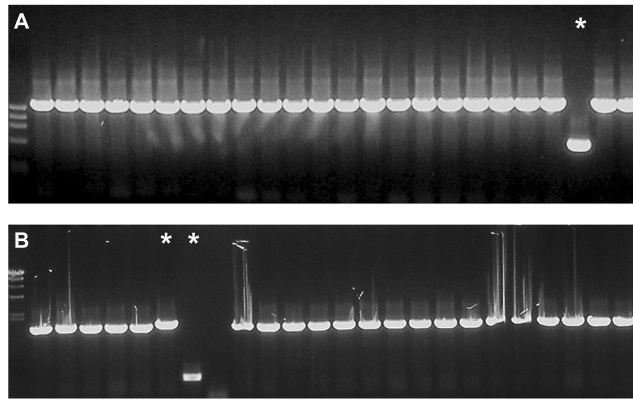

**Fig. S5.** Colony PCR of *AtICS1* and *AtICS2* RT-PCR products cloned into the pCRII-TOPO vector. Of the 24 *AtICS1* (A) and 23 *AtICS2* (B) recombinant clones, one and two were found to be splice variants (denoted by asterisks), respectively. Molecular weight markers used were PhiX174- HaeIII in (A) and Lambda-HindIII in (B).

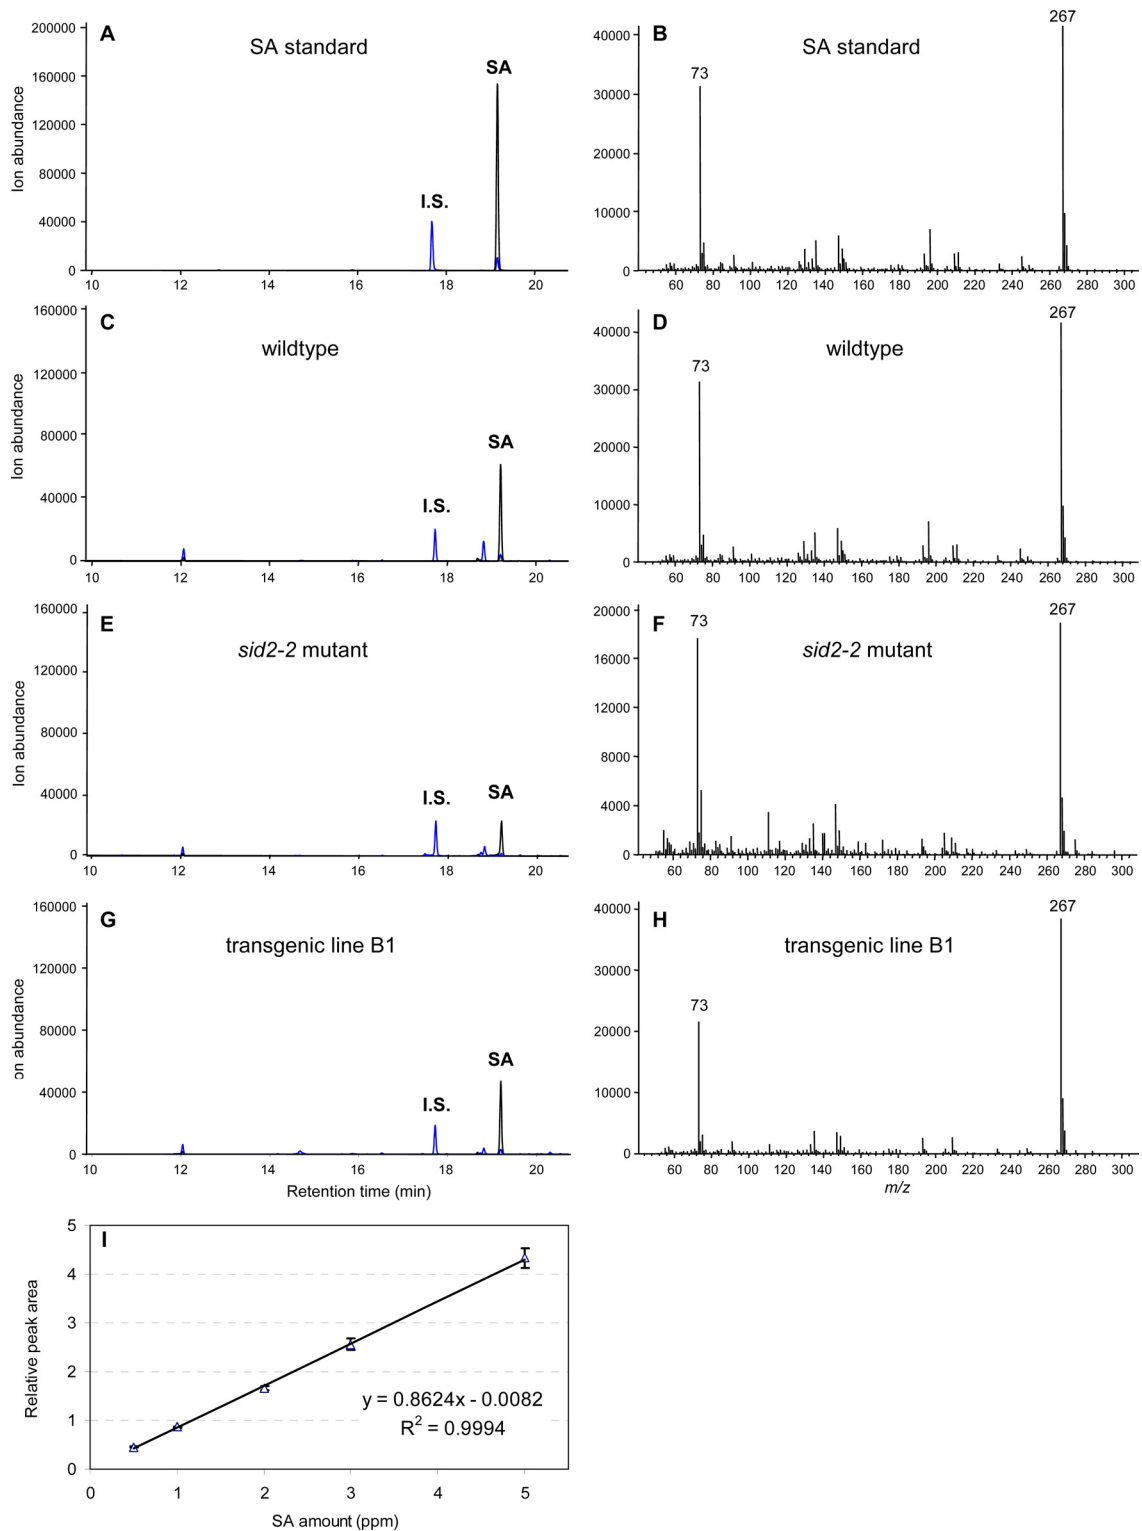

**Fig. S6.** Quantification of SA in *Arabidopsis* leaves by GC-MS. Representative selected ion chromatograms of silylated SA ( $m/z$  267, black trace) and internal standard (I.S.) *o*-anisic acid ( $m/z$  209, blue trace) are shown on the left (A, C, E, and G), and mass spectra of silylated SA on the right (B, D, F, and H). (A and B) Authentic SA standard; (C and D) wild-type; (E and F) *sid2-2* mutant; and (G and H) transgenic line B1 harboring the full-length *PtiICS* cDNA under control of the 35S promoter. (I) Calibration curve for SA. Each symbol represents means  $\pm$  SD of three independent measurements.

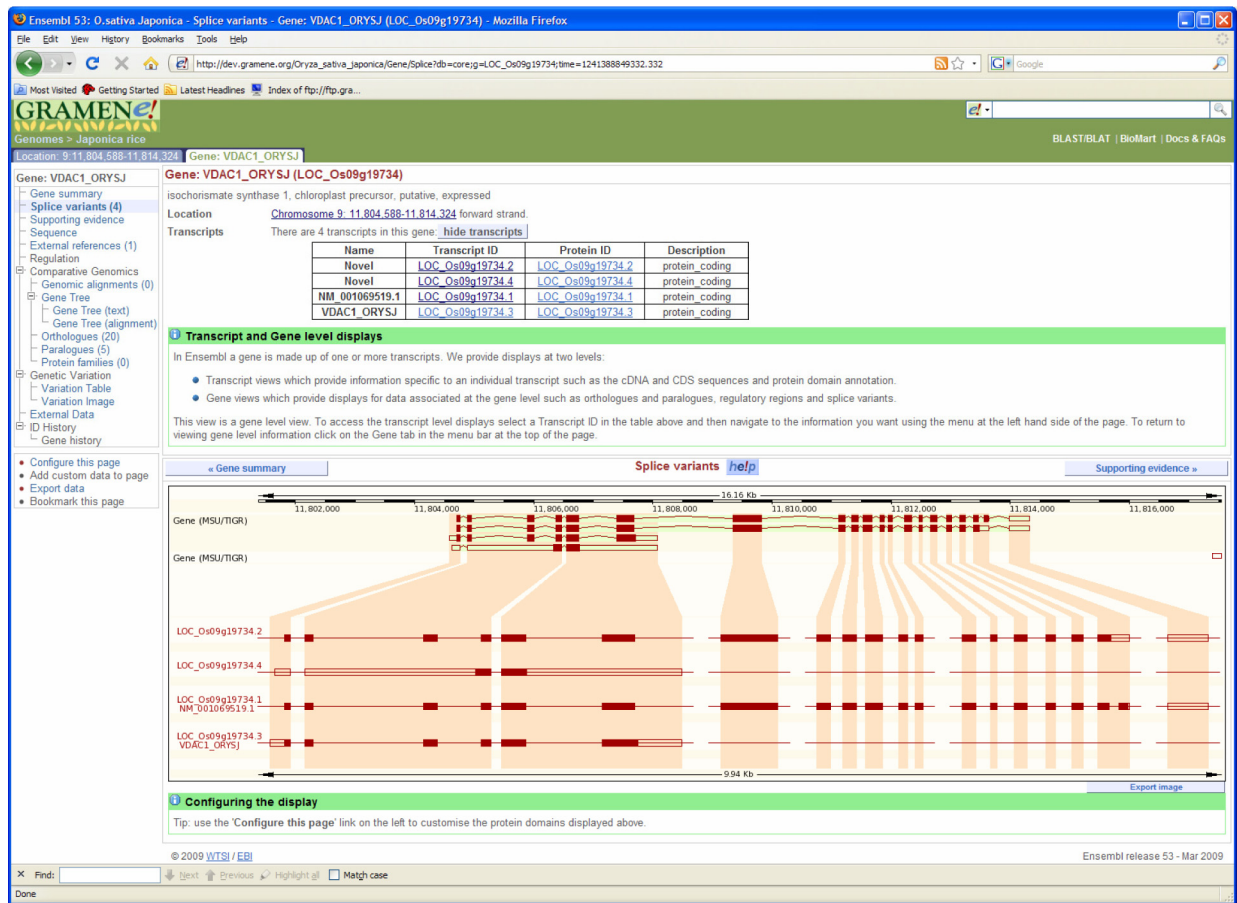

Fig. S7. Evidence of alternative splicing in rice *Os/CS* based on EST/cDNA sequences. Graph was obtained from the Gramene Rice Genome Browser ([www.gramene.org](http://www.gramene.org)).

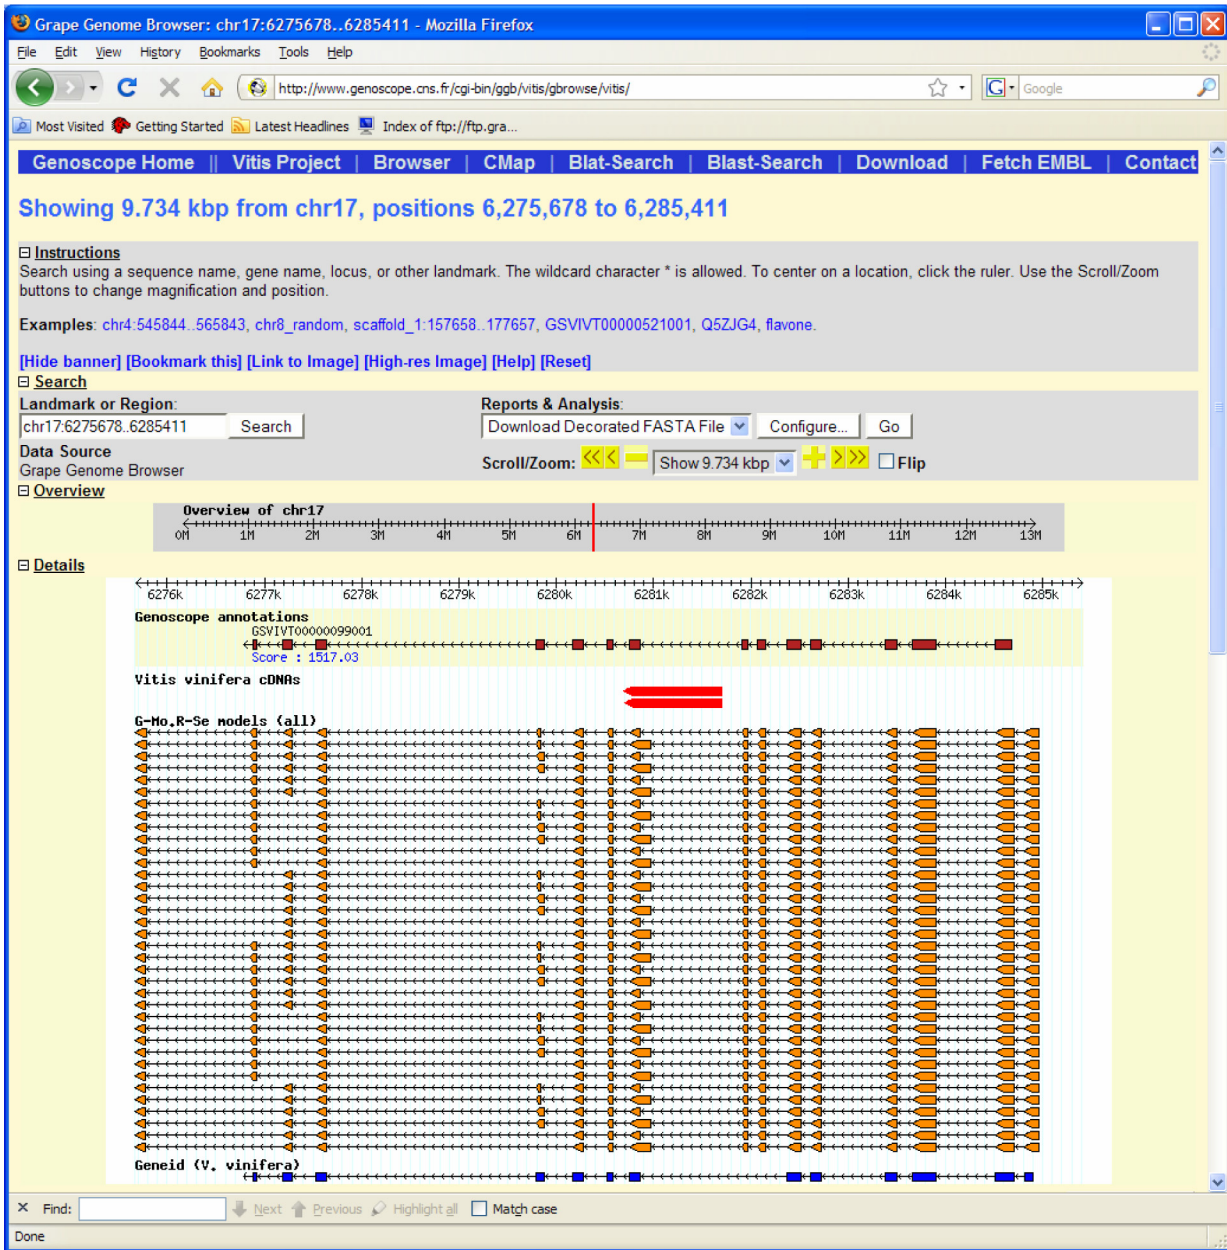

Fig. S8. Evidence of alternative splicing in grape *VVCS* based on G-MO.R-Se assembly and de novo gene model building using RNA-Seq data [Denoeud et al. (2008) *Genome Biol* 9:R175]. Graph was obtained from the Grape Genome Browser (<http://www.genoscope.cns.fr/externe/GenomeBrowser/Vitis/>).



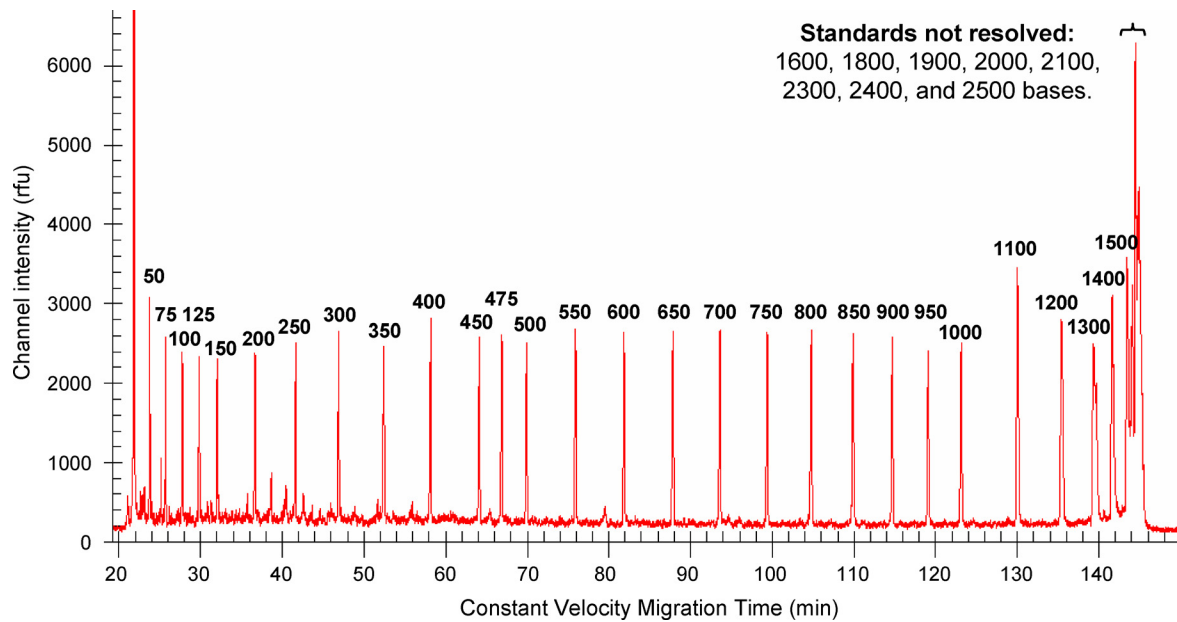

**Fig. S9.** Limitation of DNA fragment sizing by an automatic DNA sequencer. A representative chromatogram of DNA size standards, ranging in size from 50 bp to 2,500 bases, analyzed with a Beckman CEQ8000 Genetic Analyzer. Fluorescence (Well Red D1)-labeled DNA size standards were custom synthesized by BioVentures, Inc., and include the following sizes: 50, 75, 100, 125, 150, 200, 250, 300, 350, 400, 450, 475, 500, 550, 600, 650, 700, 750, 800, 850, 900, 950, 1000, 1100, 1200, 1300, 1400, 1500, 1600, 1800, 1900, 2000, 2100, 2300, 2400, and 2500 bases. The samples were analyzed using the "Fragment Analysis" module with the run time set at 3 hours, and the voltage set at 3.5 kV. Fragment sizes are indicated above the corresponding peaks, except for those that could not be resolved (>1,500 bases, marked by a bracket).

**Table S1. List of primers used in various PCR and RT-PCR amplifications**

| Primer name           | Sequence (5' to 3')                | Application                                            |
|-----------------------|------------------------------------|--------------------------------------------------------|
| PtilCSF1              | ATGGCAACCGCTACTCTAGC               | RT-PCR for <i>PtilCS</i> , PCR for 6-kb gene construct |
| PtilCSR3              | TCAGTTGATGATTCTGAGTTCTC            | RT-PCR for <i>PtilCS</i> , PCR for 6-kb gene construct |
| PtilCSF1              | Same as above                      | RT-PCR for <i>PtilCS</i> used in clone sequencing      |
| PtilCSexon16R         | GGGGAAACATTATCAAATTGC              | RT-PCR for <i>PtilCS</i> used in clone sequencing      |
| PtilCSF2noplstid      | ATGGCTAATGGCTCCAAGGAAAC            | RT-PCR for mature <i>PtilCS</i>                        |
| PtilCSR3              | Same as above                      | RT-PCR for mature <i>PtilCS</i>                        |
| PtilCSgF              | ACGTGCGACTAATGTTAAGAAAGAATTTGGCTTG | PCR for 8-kb gene construct                            |
| PtilCSgR              | ATGGTACCTAATTCAGACAGATCAGCAACAAA   | PCR for 8-kb gene construct                            |
| PtilCSF1noplastidNcol | CCATGGCTAATGGCTGCCAAGGAAAC         | <i>E. coli</i> complementation                         |
| PtilCSR3              | Same as above                      | <i>E. coli</i> complementation                         |
| AtICS1F1              | ATGGCAACTGCTGTTTTATCTCCGGCAGC      | RT-PCR for <i>AtICS1</i>                               |
| AtICS1R2new           | TCAATTAATCGCCTGTAGAGATG            | RT-PCR for <i>AtICS1</i>                               |
| AtICS1F1noplastidNcol | CCATGGCTTCTATGAATGGTTGTGATGGA      | <i>E. coli</i> complementation                         |
| AtICS1R2new           | Same as above                      | <i>E. coli</i> complementation                         |
| AtICS2F1              | ATGGCAAACGGATGTGAGGCTGACCA         | RT-PCR for <i>AtICS2</i>                               |
| AtICS2R2              | TTAGTTGATTGGTTGCAAAGC              | RT-PCR for <i>AtICS2</i>                               |
| EntCFNcol             | CCATGGCAAATCCGTCCTCGCCTTTG         | <i>E. coli</i> complementation                         |
| EntCRstop             | TTAATGCAATCCAAAAACGTTCAACA         | <i>E. coli</i> complementation                         |
